# Supplementary material
Source: PubMed Central journal article supplement (PMC8223476)
Supplement: mmc1.pdf [file mmc1.pdf]

**Cell Chemical Biology, Volume 28**

**Supplemental information**

**Directed evolution of potent  
neutralizing nanobodies against SARS-CoV-2 using  
CDR-swapping mutagenesis**

**Jennifer M. Zupancic, Alec A. Desai, John S. Schardt, Ghasidit Pornnoppadol, Emily K. Makowski, Matthew D. Smith, Andrew A. Kennedy, Mayara Garcia de Mattos Barbosa, Marilia Cascalho, Thomas M. Lanigan, Andrew W. Tai, and Peter M. Tessier**

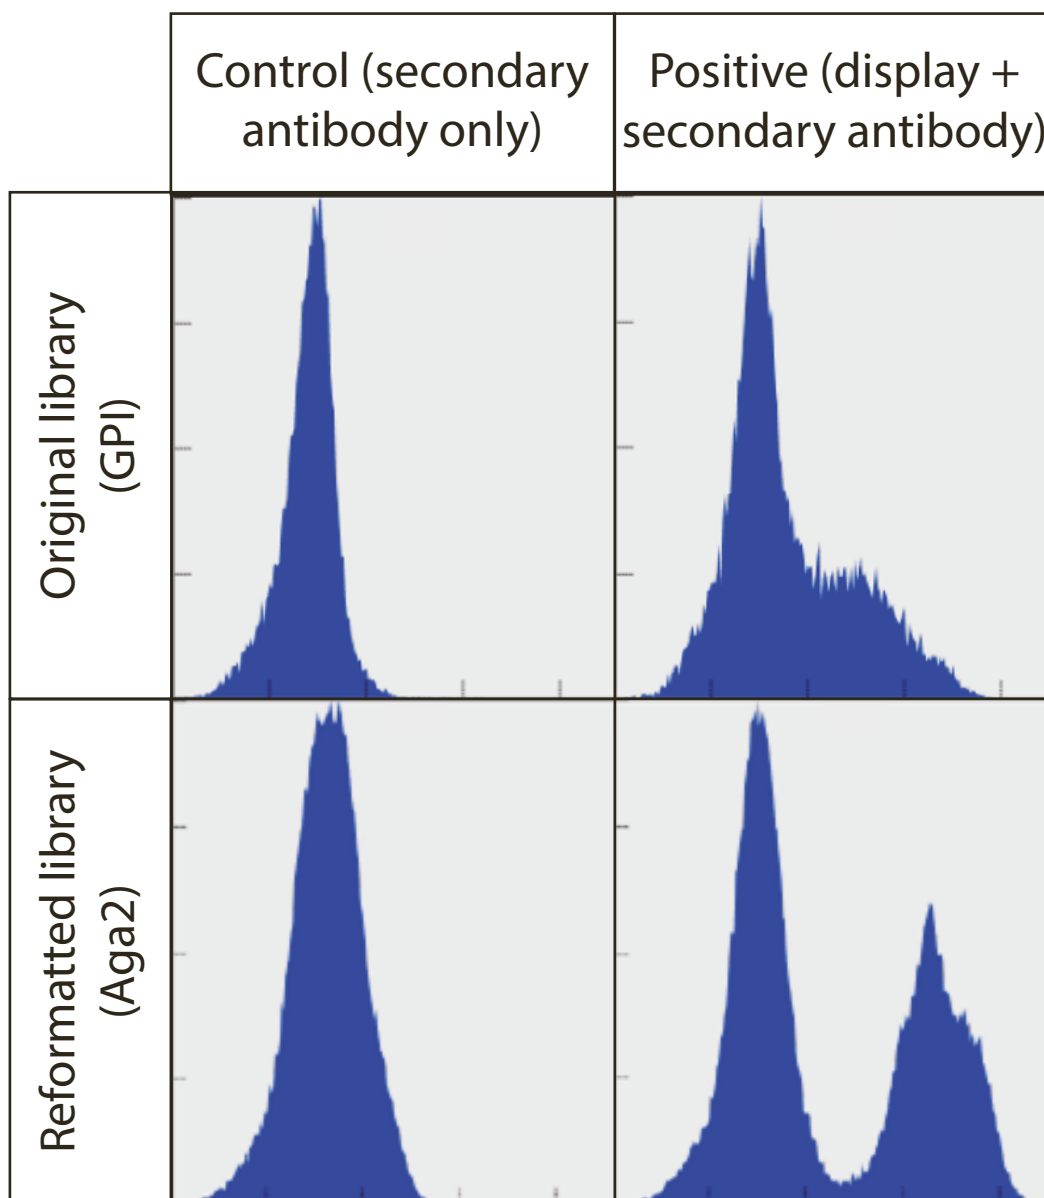

**Figure S1. Reformating the nanobody library from a GPI-anchored format to an Aga2 display format improves nanobody display levels on the yeast surface.** The expression levels of the nanobody libraries were compared between two display formats, namely a GPI (glycosylphosphatidylinositol)-anchored format that displays nanobodies as GPI-linker-nanobody fusions and an Aga2 format that displays nanobodies as Aga2-linker-nanobody fusions. The yeast cells were induced to promote nanobody expression for two days, and nanobody expression levels were detected via anti-HA tag (GPI) and anti-Myc tag (Aga2) antibodies. See STAR Methods.

### CDR1

KA1 1 QVQLVESGGGLVQAGGSLRLSCAAS 26 35 **GYIFGRNAMG**WYRAQAP  
KA1.ep1 . . . . .  
KC3 . . . . . **F** . . . . .  
KC3.ep3 <sup>E</sup> . . . . . **F** . . . . .  
KC3.ep5 . . . . .

### CDR2

KA1 50 65 GKERELVA **AITRGGG-TYYADSVKG**RFTISRDNKNTVYLQM  
KA1.ep1 . . . . . - . . . . .  
KC3 . . . . . **G.NW.DN** . . . . .  
KC3.ep3 . . . . . **G** . . . . . - . . . . .  
KC3.ep5 . . . . . - . . . . .

### CDR3

KA1 93 102 113 NSLKPEDTAVYYC **AADPGDVGSDFDY**WGQGTQVTVSS  
KA1.ep1 . . . . . **NADPYFWE--FDS** . . . . .  
KC3 . . . . . **NADPYFWE--FDS** . . . . .  
KC3.ep3 . . . . . **NADPYFWE--FDS** . . . . .  
KC3.ep5 . . . . . G . . . . . **NADPYLWE--FDS** . . . . .

**Figure S2. Amino acid sequences of the affinity-matured nanobodies in this work.** The sequences are shown for Kabat numbering except CDR1 (combined Chothia and Kabat definition) and CDR3 (additional two N-terminal residues included in the CDR). See also Figure 2.

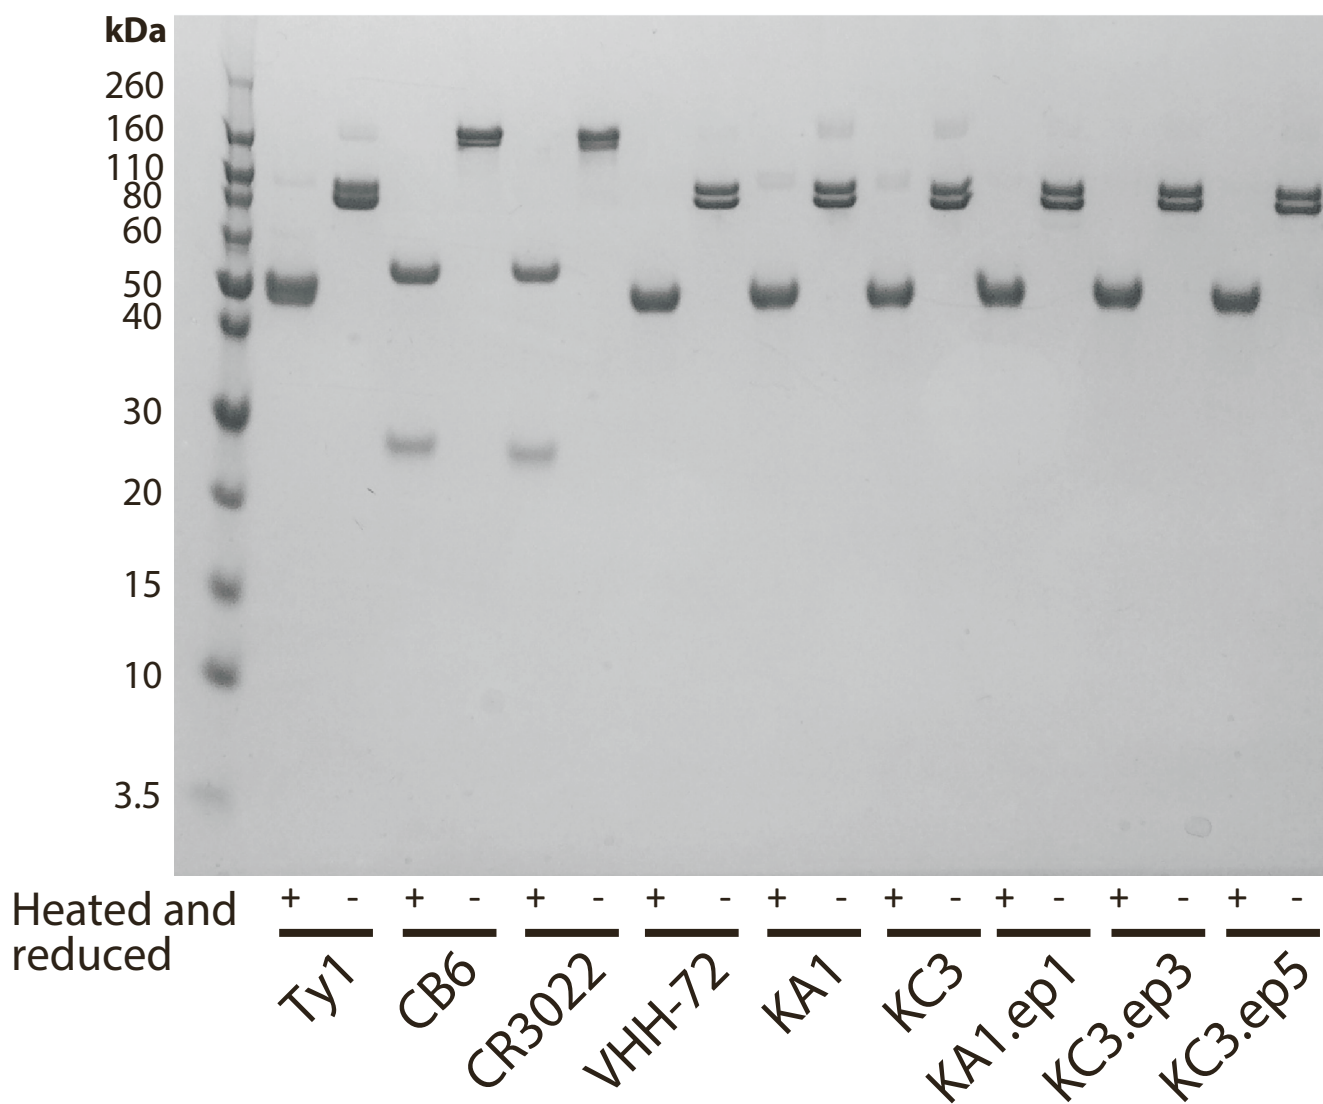

**Figure S3. SDS-PAGE analysis of the nanobodies and antibodies used in this work.** The nanobodies and antibodies were evaluated for samples without both heating and reducing (-) or with both heating and reducing (+). See STAR Methods.

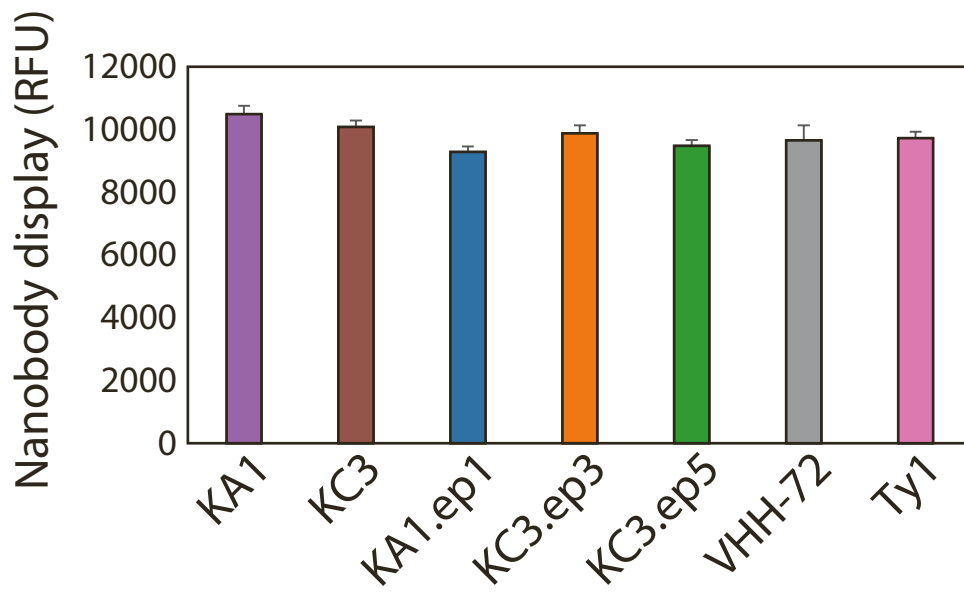

**Figure S4. Display levels of nanobodies as Aga2 fusion proteins on the yeast surface.** Nanobody-Aga2 expression levels on the yeast surface were detected using mouse anti-Myc antibody (1000x dilution) and goat anti-mouse IgG AF488 (200x dilution) using a Bio-Rad ZE5 analyzer. The results are averages from two independent repeats and the error bars are standard deviations. See STAR Methods.

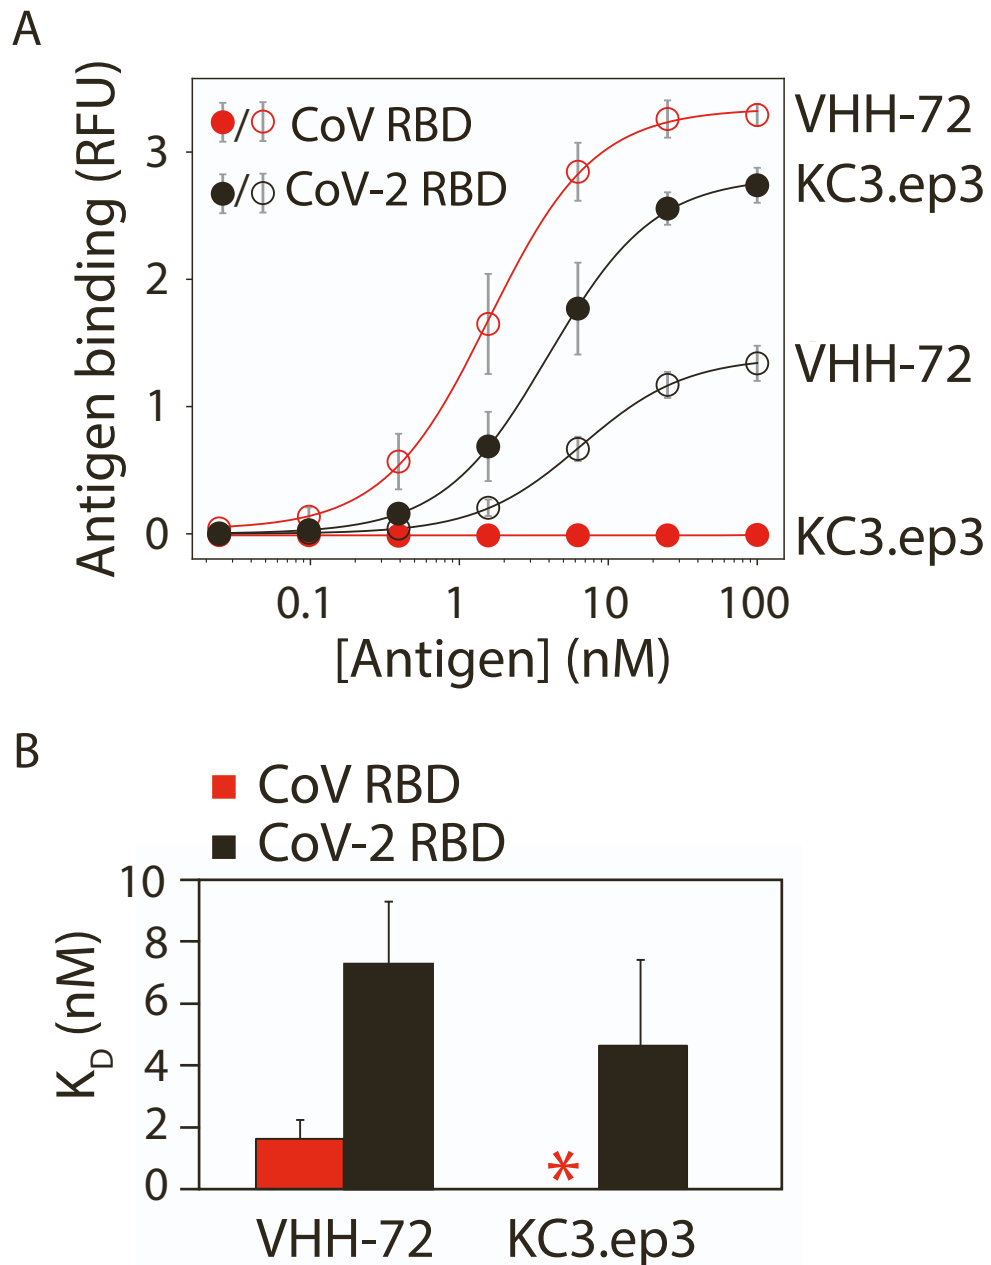

**Figure S5. Affinity-matured nanobody selectively recognizes SARS-CoV-2 receptor-binding domain.**

(A) Concentration-dependent, monovalent nanobody binding to the receptor-binding domains of SARS-CoV and SARS-CoV-2. The nanobodies were displayed on the yeast surface and binding to the biotinylated receptor-binding domains was detected via flow cytometry. VHH-72 was originally identified against SARS-CoV and cross reacts with SARS-CoV-2. (B) Equilibrium binding constants ( $K_D$ ) for nanobodies binding to the receptor-binding domains of SARS-CoV and SARS-CoV-2. In (A) and (B), the results are averages from three independent repeats and error bars are standard deviations. See STAR Methods.

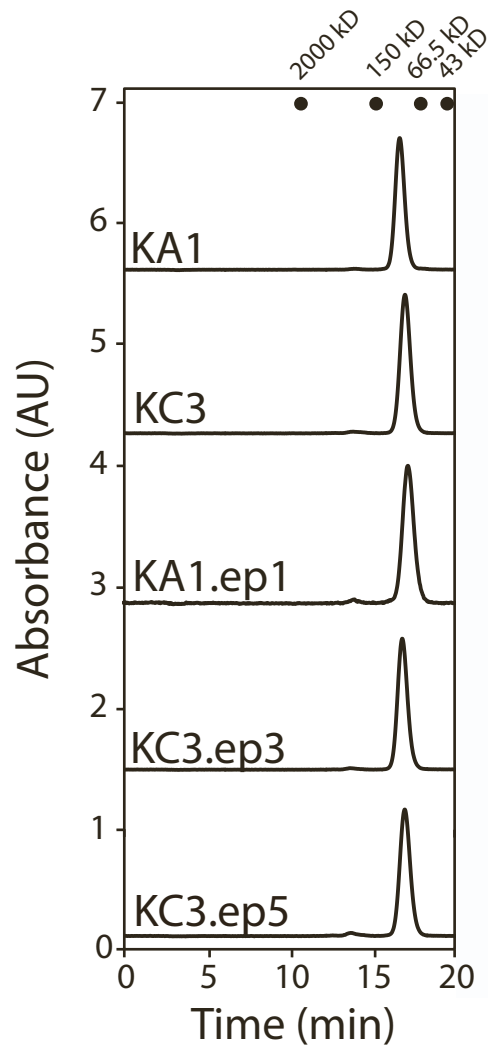

**Figure S6. Size-exclusion chromatography analysis of the lead and affinity-matured nanobodies.** The nanobodies were purified using Protein A and size-exclusion chromatography. The running buffer was PBS (pH 7.4) with 200 mM arginine. See STAR Methods.

### CDR1

KA1 QVQLVESGGGLVQAGGSLRLSCAAS<sup>26</sup>GYIFGRNAMG<sup>35</sup>WYRQAPG  
KC1 .....G..IG.....  
K7.13 .....  
KC3 .....F.....  
K7.19 .....

### CDR2

KA1 KERELVAAIT<sup>50</sup>-RGGSTYYADSVKGR<sup>65</sup>FTISRDNKNTVYLQMN  
KC1 .....T.RNI..T.....  
K7.13 .....  
KC3 .....G.NWG.DN.....  
K7.19 .....

### CDR3

KA1 SLKPEDTAVYYCAADPGDVGSD<sup>93</sup>F-----DYWGQGTQVTVSS<sup>113</sup>  
KC1 .....NT..APGNPLLRYPDF.....  
K7.13 .....NT..APGNPLLRYPDF.....  
KC3 .....N..YFWEF--.....S.....  
K7.19 .....N..YFWEF--.....

**Figure S7. Amino acid sequences of the nanobodies generated via CDR-swapping mutagenesis relative to the initial non-mutagenized lead clones.** The clones identified by CDR-swapping mutagenesis are K7.13, and K7.19 in addition to KA1.ep1 (not shown). The sequences are shown for Kabat numbering except CDR1 (combined Chothia and Kabat definition) and CDR3 (additional two N-terminal residues included in the CDR). See also Figure 7.
